# Supplementary material
Source: PubMed Central journal article supplement (PMC2848705)

## Supporting Information

### 'Carba'-Analogues of Fentanyl are Opioid Receptor Agonists

Grazyna Weltrowska, Nga N. Chung, Carole Lemieux, Jianxin Guo, Yixin Lu,\*  
Brian C. Wilkes and Peter W. Schiller\*

#### Table of Contents

#### Stereochemical assignment of the two isomers of compound 1 by homonuclear decoupling NMR experiments

**Figure 1.**  $^1\text{H}$  NMR spectra of compound **1** recorded in  $\text{DMSO-}d_6$  (0.8-4.8 ppm region). Top panel: isomer 1, bottom panel: isomer 2.

**Figure 2.** NOESY/EXSY spectra of compound **1** in  $\text{DMSO-}d_6$ . Top panel: isomer 1, bottom panel: isomer 2. At  $20^\circ\text{C}$ , each isomer has two rotamers due to slow rotation of the N-CO bond.

**Figure 3.** Expansion of the  $^1\text{H}$  NMR spectrum high-lighting the 1-H proton for isomer 1 (top panel) and isomer 2 (bottom panel). Clearly, the 1-H is an axial proton for both isomers.

**Figures 4a and 4b.**  $^1\text{H}$  homonuclear decoupling experiments performed with isomer 1 in  $\text{DMSO-}d_6$ . Irradiation of the 2-,6-protons confirms that 1-H is an axial proton. 4-H could not be identified because it is overlapped with the 3- and 5-protons.

**Figures 5a and 5b.**  $^1\text{H}$  homonuclear decoupling experiments performed with isomer 2 in  $\text{DMDO-}d_6$ . Irradiation of the 2-,6-protons confirms that 1-H is an axial proton. Irradiation of the 3-5-protons confirms that 4-H is an axial proton. Therefore isomer 2 is the *trans* isomer.

---

Corresponding authors: For P.W.S.: phone, +1-514-987-5576; fax, +1-514-987-5513; E-mail, [schillp@ircm.qc.ca](mailto:schillp@ircm.qc.ca). For Y.L.: phone: +65-6516-1569; fax: +65-6779-1691; E-mail, [chmlyx@nus.edu.sg](mailto:chmlyx@nus.edu.sg)

Figure 1

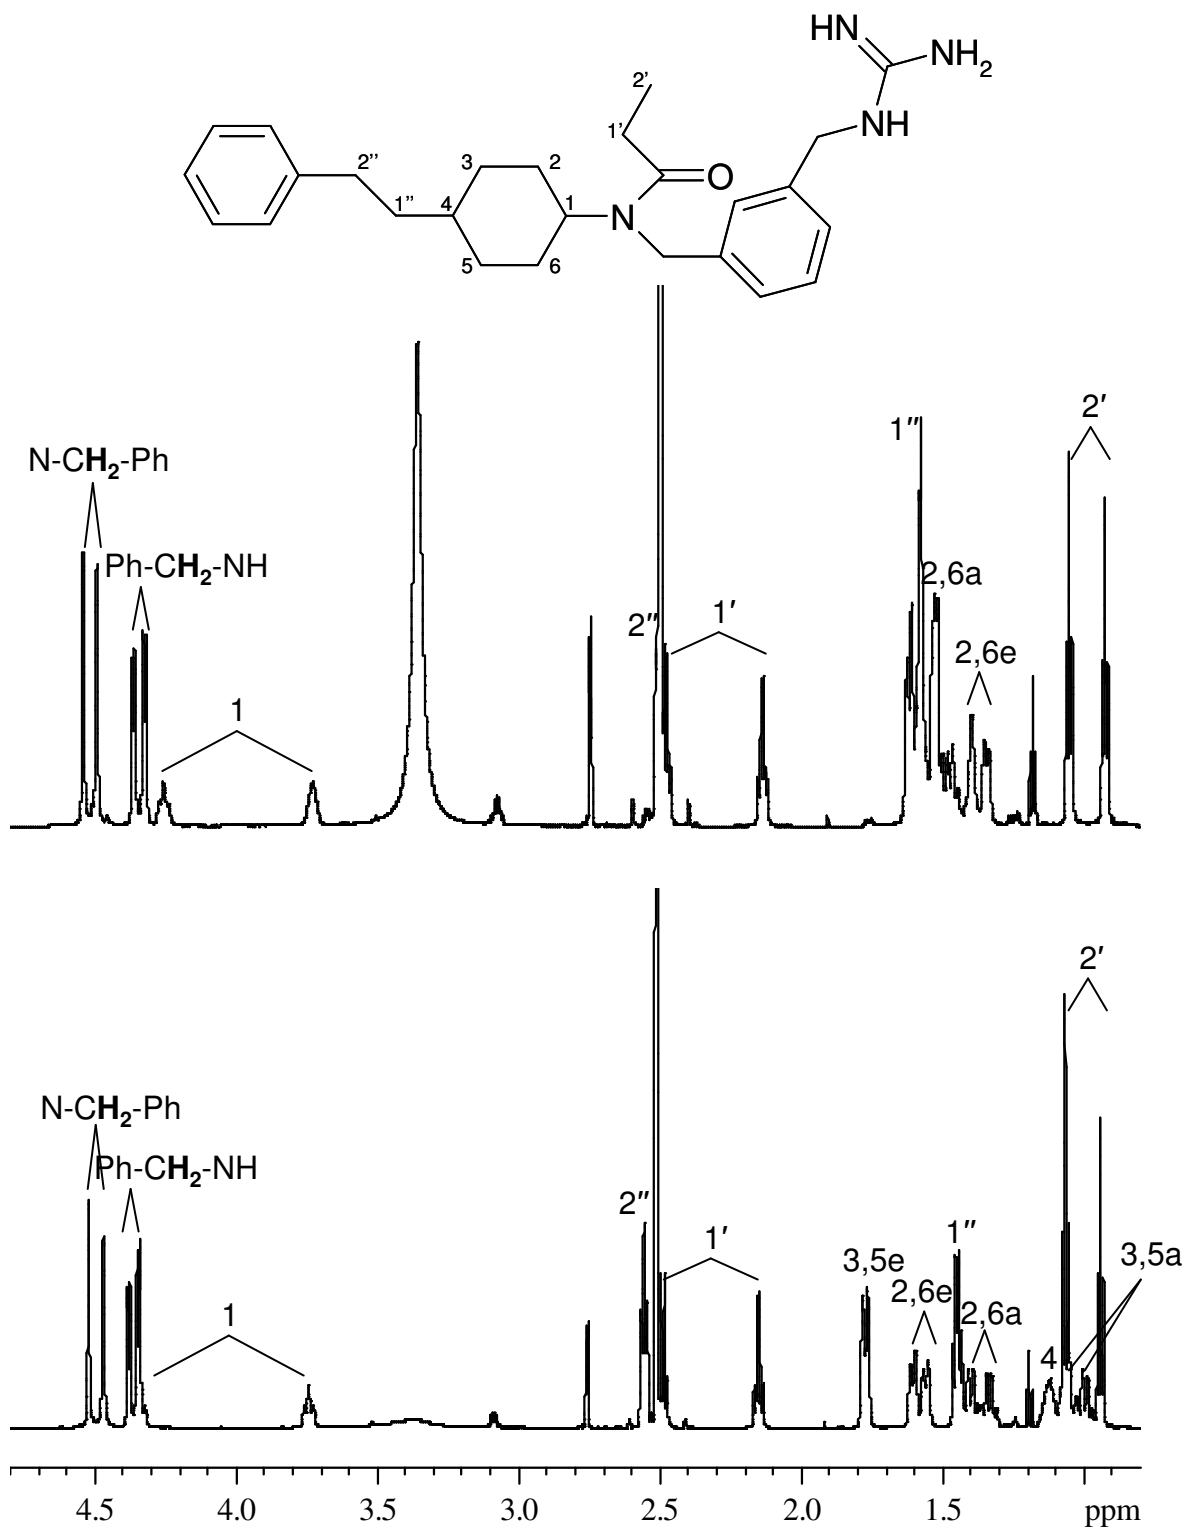

Figure 2

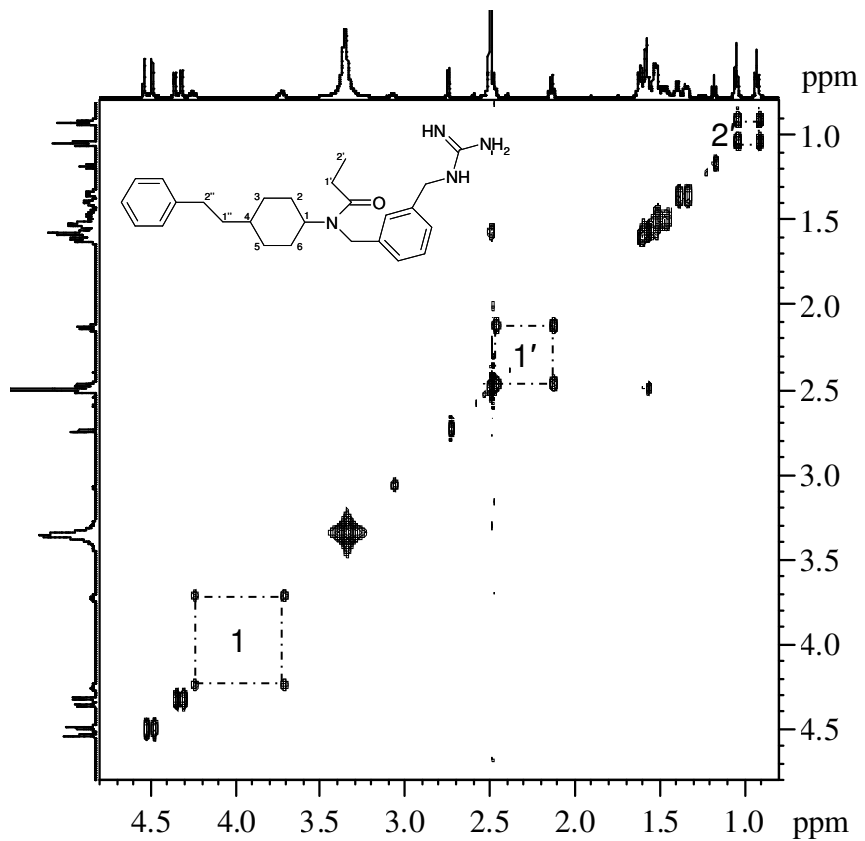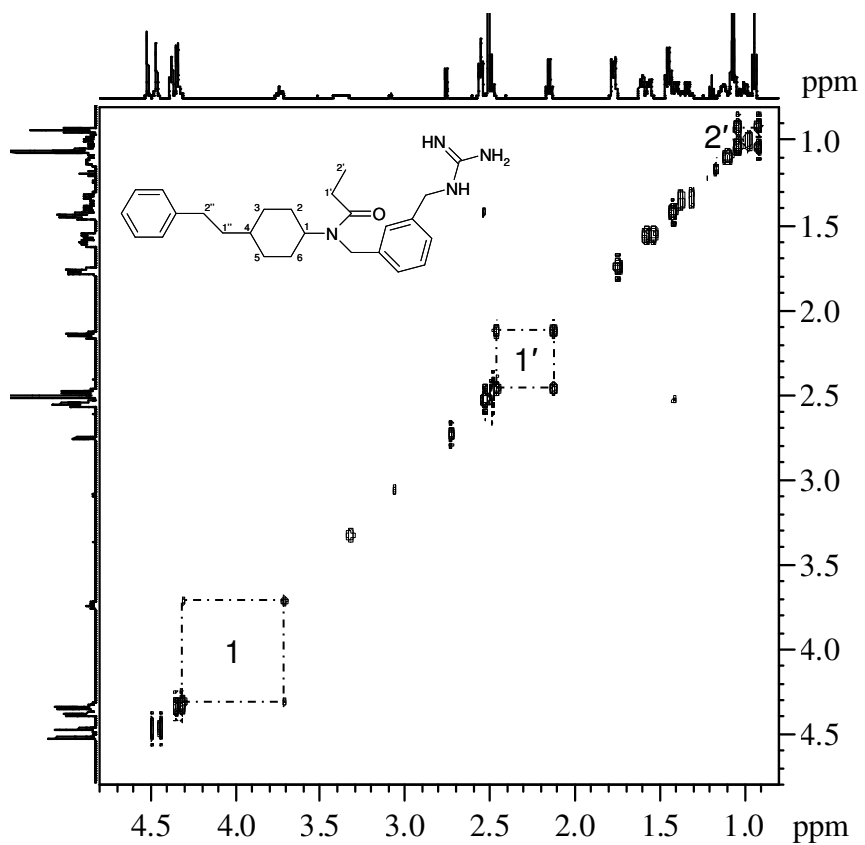

Figure 3

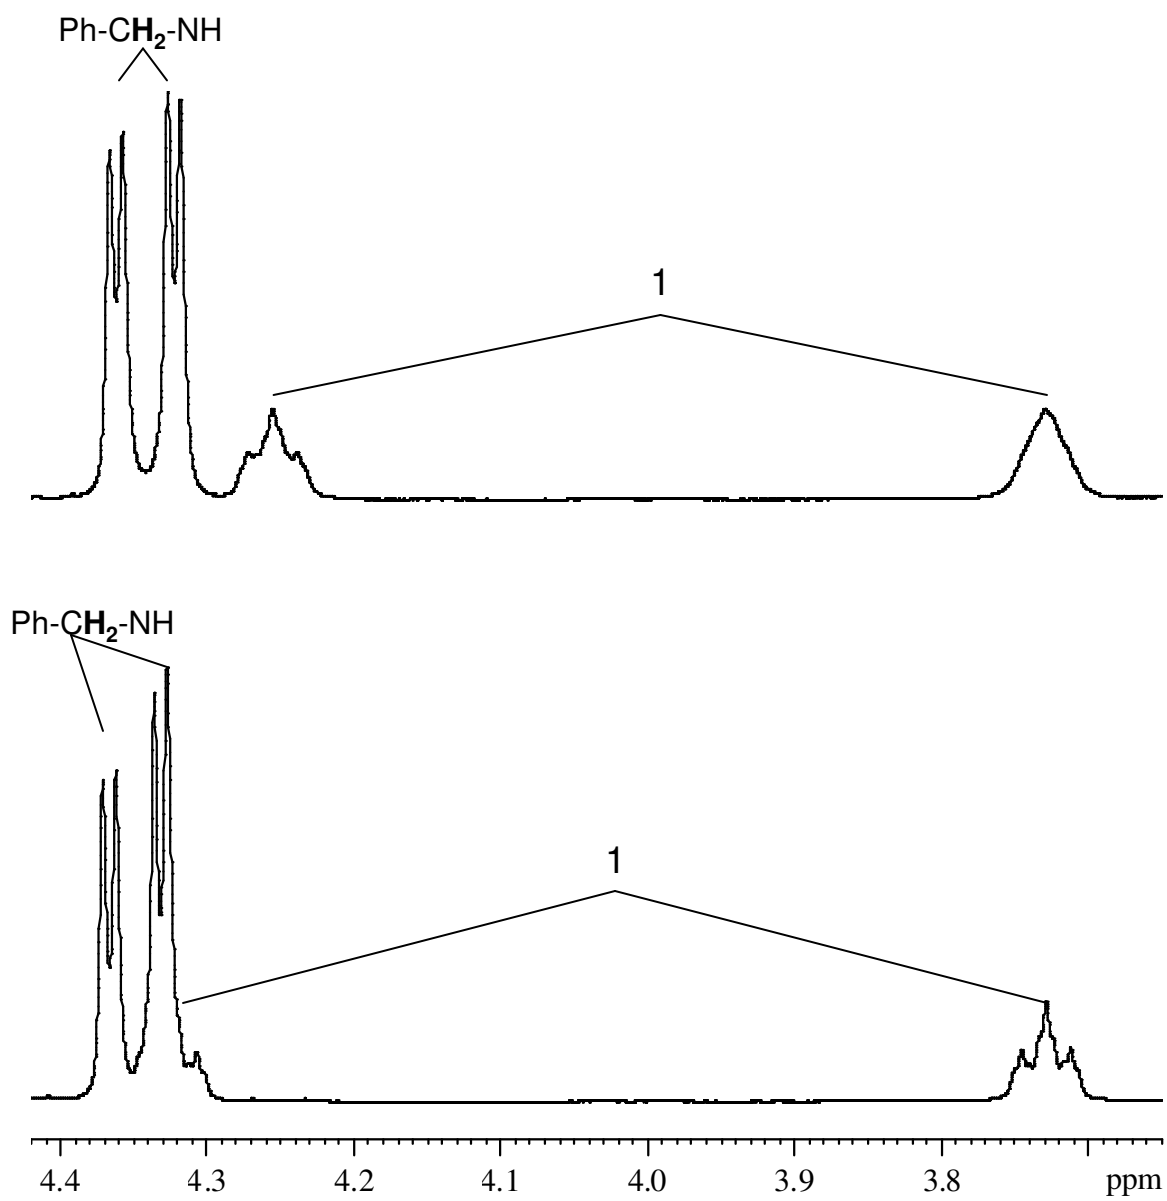

Figure 4a

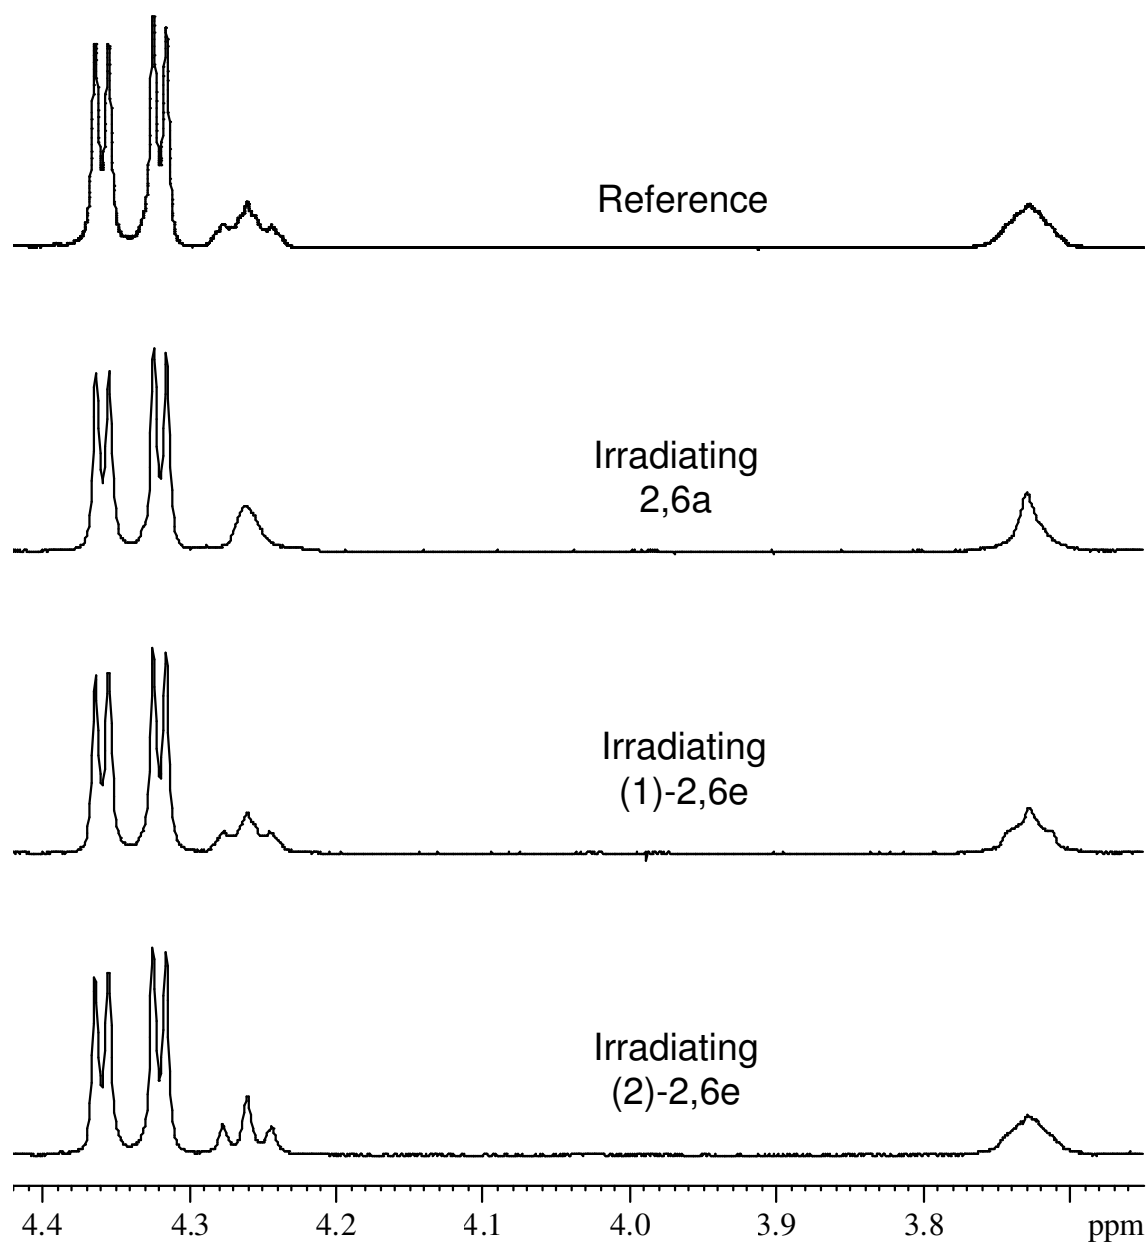

Figure 4b

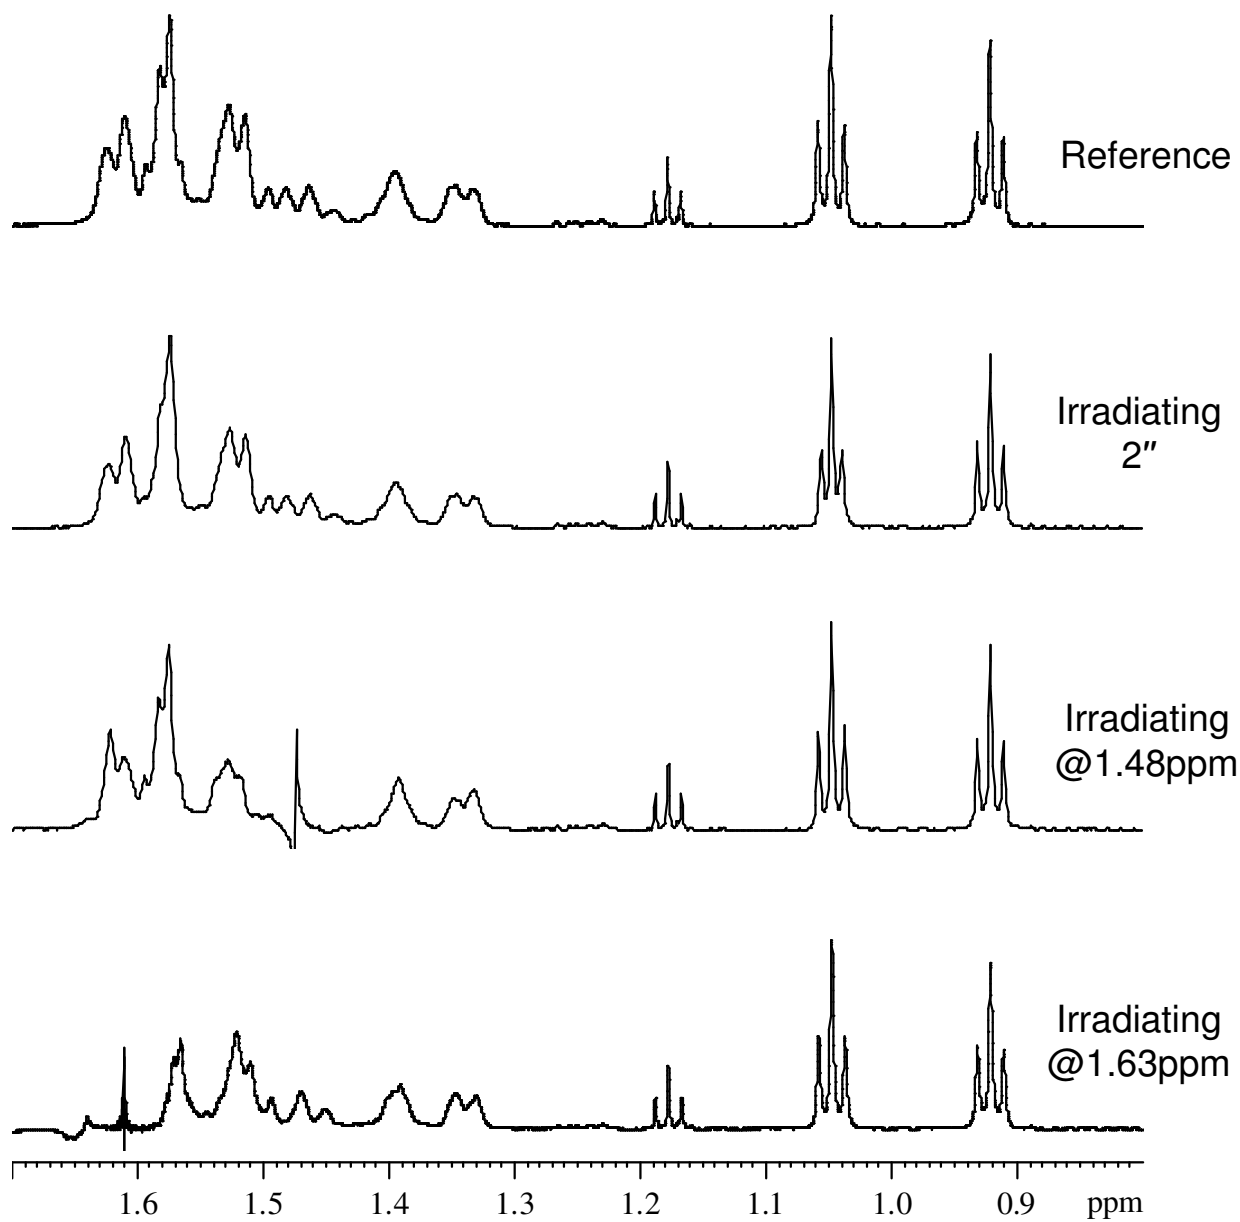

Figure 5a

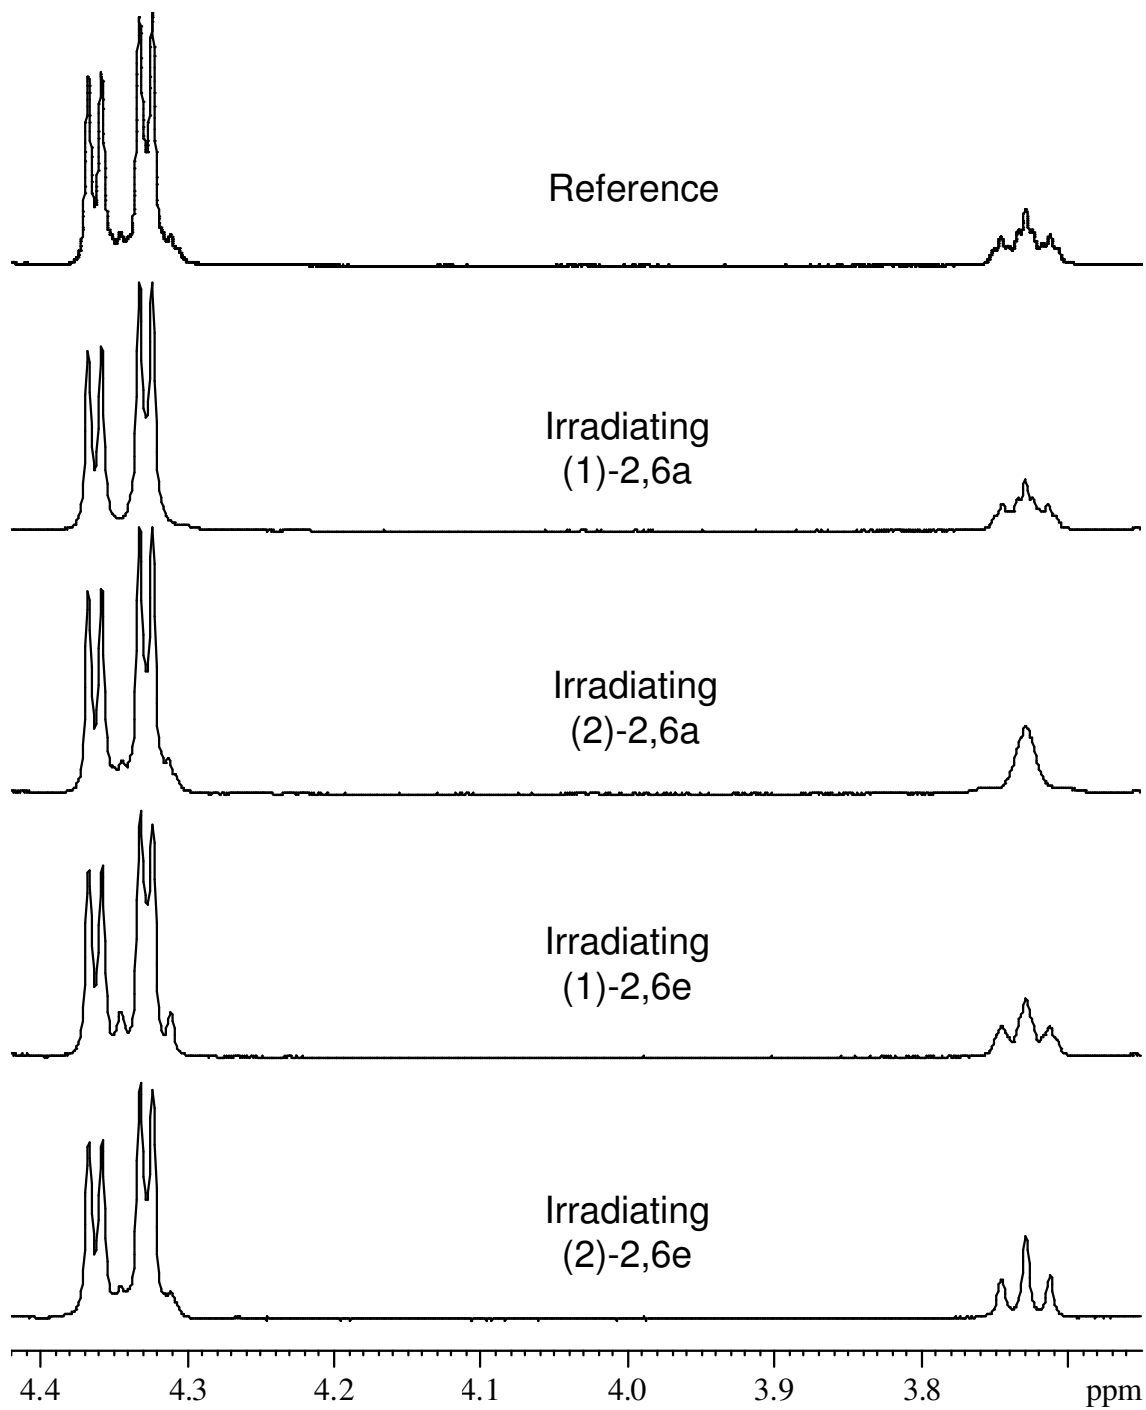

Figure 5b

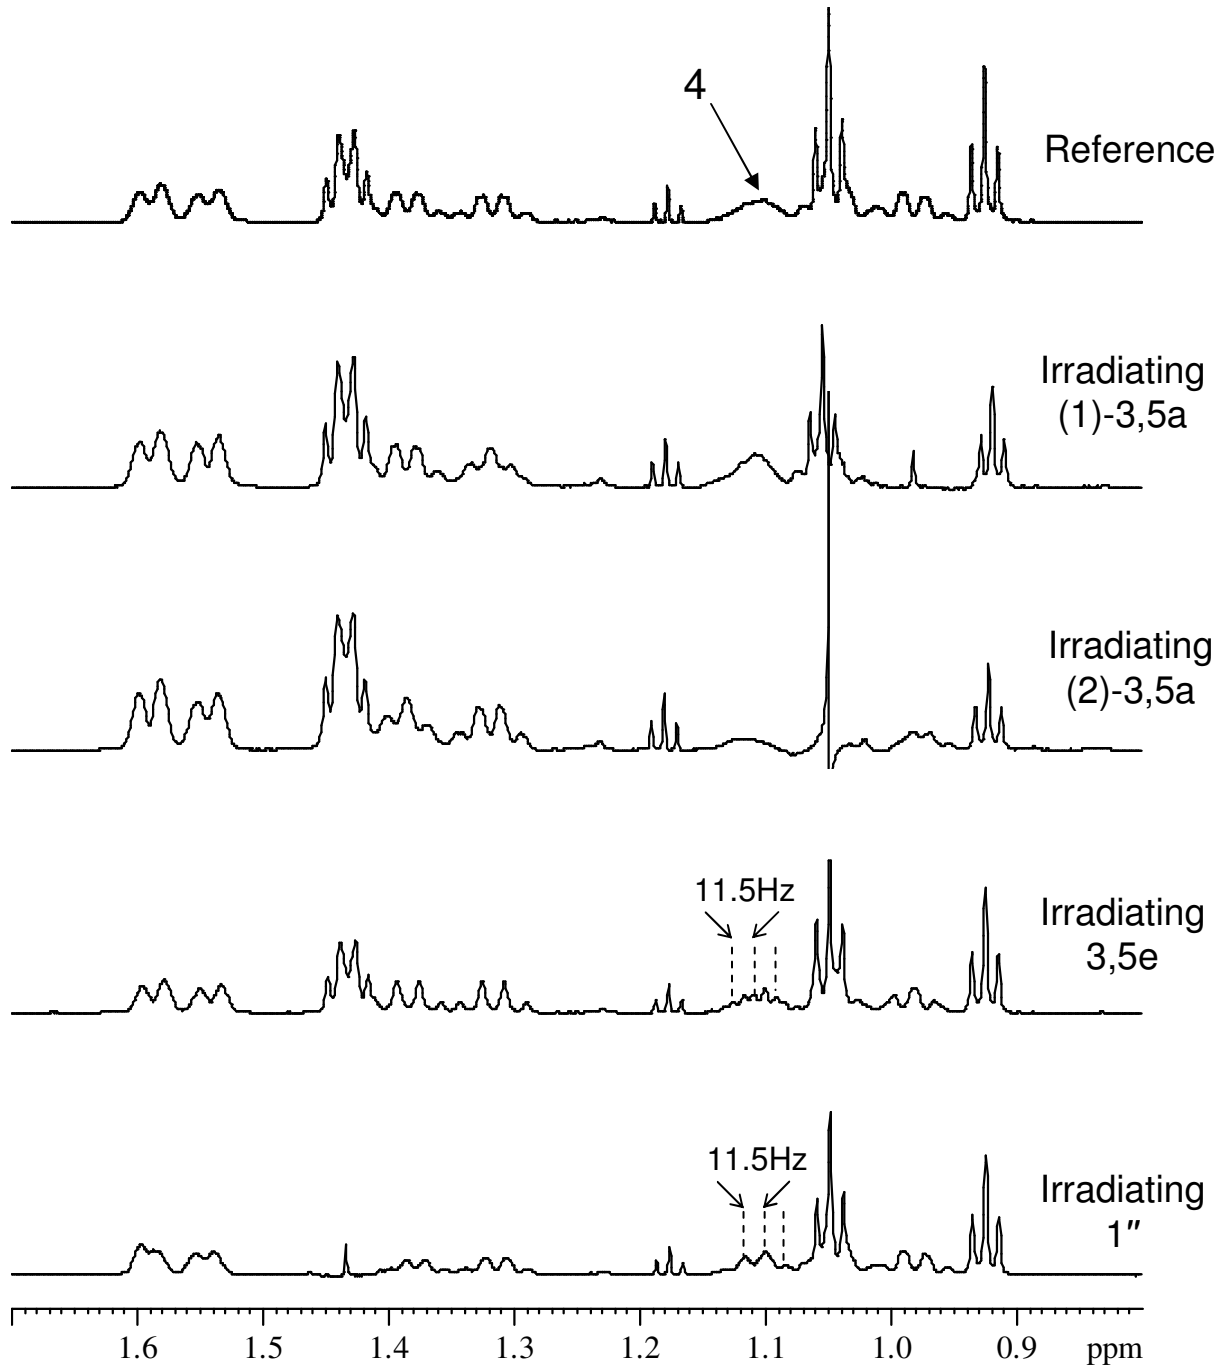

Supplement: NIHMS187024-supplement-1_si_001.pdf [file NIHMS187024-supplement-1_si_001.pdf]
